# Supplementary material for: Effects of Graphite Oxide Nanoparticle Size on the Functional Properties of Layer-by-Layer Coated Flexible Foams
Source: PubMed Central journal article supplement (PMC7909570; doi:10.3390/nano11020266), 2021-01-20
Supplement: nanomaterials-11-00266-s001.pdf [file nanomaterials-11-00266-s001.pdf]

Supplementary Materials

# Effects of Graphite Oxide Nanoparticle Size on the Functional Properties of Layer-by-Layer Coated Flexible Foams

Lorenza Maddalena <sup>1</sup>, Julio Gomez <sup>2</sup>, Alberto Fina <sup>1</sup> and Federico Carosio <sup>1,\*</sup>

<sup>1</sup> Dipartimento di Scienza Applicata e Tecnologia, Politecnico di Torino, Alessandria Campus, Viale Teresa Michel 5, 15121 Alessandria, Italy; lorenza.maddalena@polito.it (L.M.); alberto.fina@polito.it (A.F.)

<sup>2</sup> Avanzare Innovacion Tecnologica S.L, Avda. Lentiscares 4-6, Poligono Industrial Lentiscares, 26370 Navarrete, Spain; julio@avanzare.es

\* Correspondence: federico.carosio@polito.it

## Graphite oxide preparation and characterization

Water dispersion of graphite oxide was prepared using a modified Hummers' method in H<sub>2</sub>SO<sub>4</sub>. Starting from large flakes of natural graphite (NGS-Naturgraphit) and using a proportion of graphite/KMnO<sub>4</sub>/NaNO<sub>3</sub> 1:3.75:0.25. The reaction temperature inside the reactor was kept between 0 and 4 °C during the oxidants addition (72 h). After that time, resulting solution was slowly warmed up to 20°C and maintained for 72 hours of reaction. To remove the excess of MnO<sub>4</sub><sup>-</sup>, H<sub>2</sub>O<sub>2</sub> solution was added to the reaction mixture and stirred overnight. After sedimentation, the solution was washed with a mechanical stirred HCl 4 %wt solution by 2 h. The solid was filtered off obtaining wet graphite oxide. Wet graphite oxide was dispersed in deionized water (1 %wt based on dry graphene oxide) and stirred in a in a Dispermat LC75 using a cowless helix at 1000 rpms for 10 minutes and them at 20.000 rpms for 60 seconds. Then, this dispersion was ultrasonicated with a UP400S HIELCHER using a H22 sonotrode with 90% of amplitude and full cycle condition to exfoliate the graphite oxide for different times in order to obtain GO with different average lateral size: 30 min for GO<sub>A</sub>, 60 min for GO<sub>B</sub> and 120 min for GO<sub>C</sub>. The pH of the suspensions was measured in the first 24h after its preparation with a calibrated pH meter.

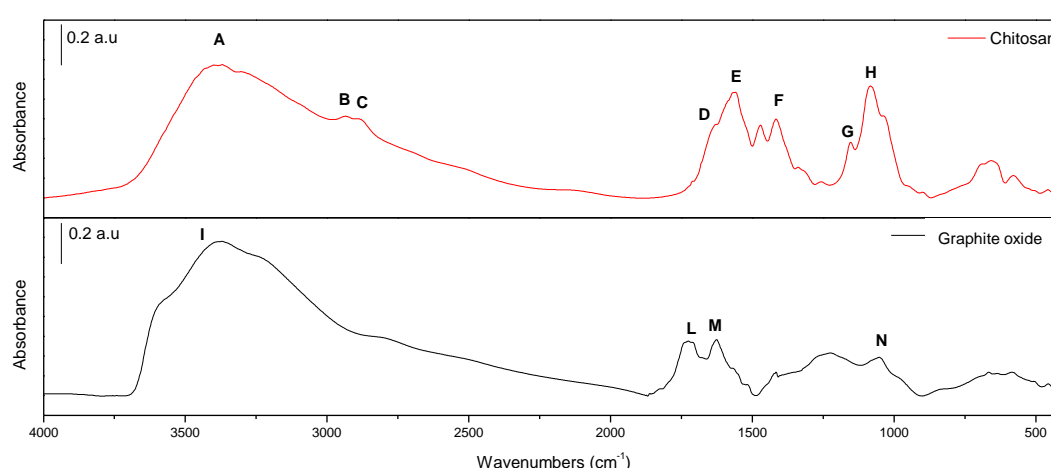

**Figure S1.** FTIR spectra of chitosan and GO<sub>A</sub> signal attribution.

**Table S1.** Attribution of chitosan and graphite oxide FTIR signal.

|                | <b>Signal</b> | <b>Wavenumbers (cm<sup>-1</sup>)</b> | <b>Attribution</b>                             |
|----------------|---------------|--------------------------------------|------------------------------------------------|
| Chitosan       | A             | 3800–3000                            | $\nu(\text{O-H})$ and $\nu(\text{N-H})$        |
|                | B             | 2900                                 | $\nu_{\text{as}}(\text{C-H})$ of $\text{CH}_2$ |
|                | C             | 2880                                 | $\nu_{\text{s}}(\text{C-H})$ of $\text{CH}_2$  |
|                | D             | 1640                                 | $\delta_{\text{as}}(\text{NH}_3^+)$            |
|                | E             | 1556                                 | $\delta_{\text{s}}(\text{NH}_3^+)$             |
|                | F             | 1156                                 | $\text{NH}_3^+$ rocking                        |
|                | G             | 1411                                 | $\delta(\text{C-H})$ of $\text{CH}_2$          |
|                | H             | 1080                                 | $\nu(\text{C-O-C})$ of glycosidic units        |
|                | I             | 3800–3000                            | $\nu(\text{O-H})$                              |
| Graphite Oxide | L             | 1725                                 | $\nu(\text{C=O})$                              |
|                | M             | 1627                                 | $\nu(\text{O-C=O})$                            |
|                | N             | 1054                                 | $\nu(\text{C-O})$                              |

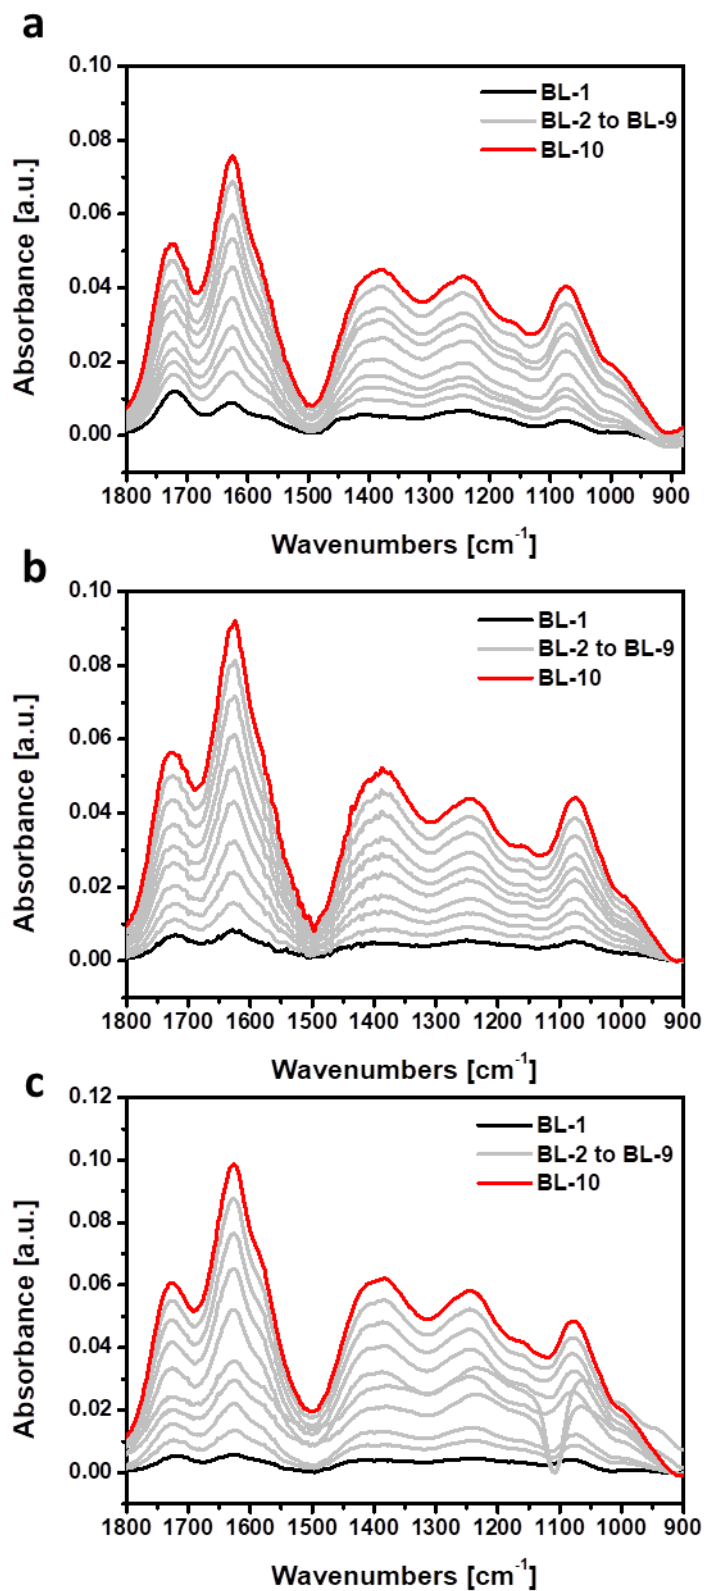

Figure S2. FTIR LbL growth of 10 BL CHIT/ $\text{GO}_A$  (a), 10 BL CHIT/ $\text{GO}_B$  (b) and 10 BL CHIT/ $\text{GO}_C$  (c).

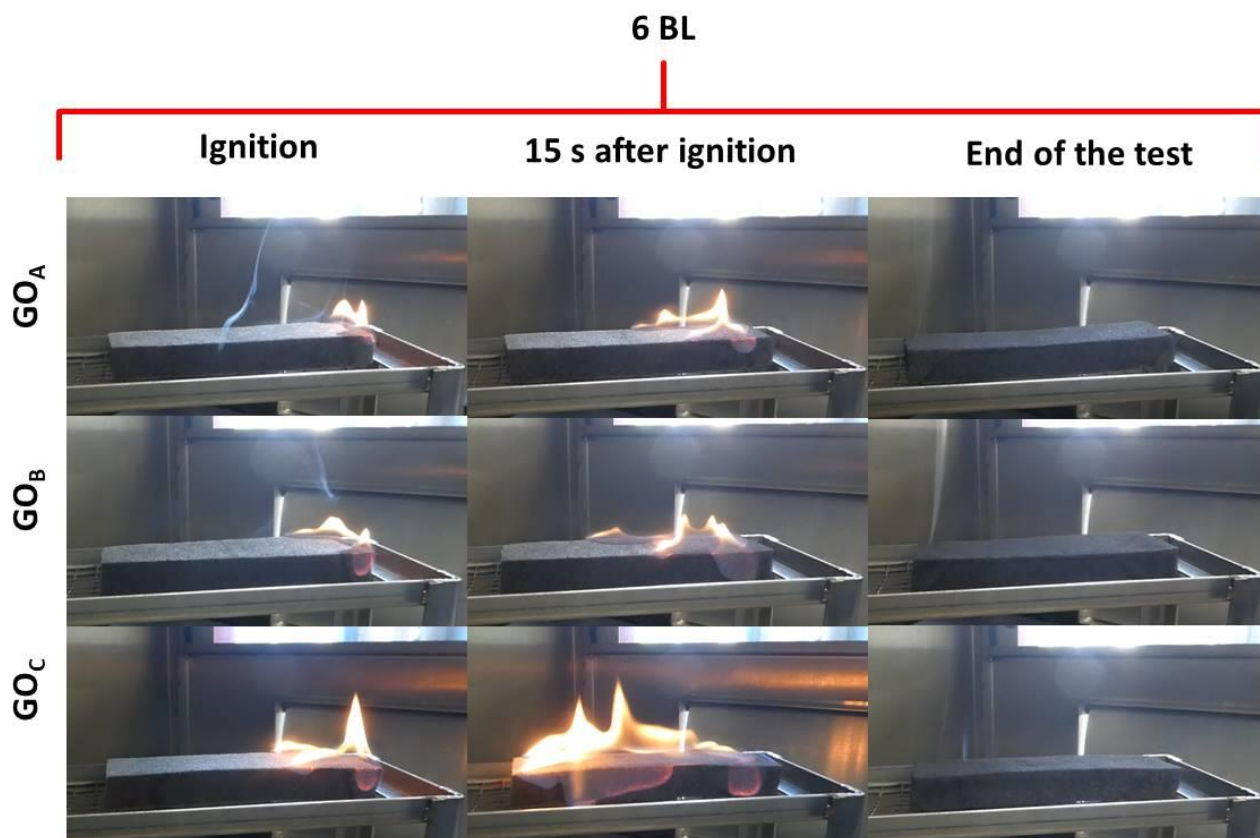

**Figure S3.** Pictures of flammability test in horizontal configuration of 6 BL CHIT/GO<sub>A</sub> treated PU foam, 6 BL CHIT/GO<sub>B</sub> PU foam and 6 BL CHIT/GO<sub>C</sub> PU foam . First column: right after ignition, second column: 15 seconds after ignition and third column: end of the test.
